# Supplementary material for: Synthesis of polycrystalline cobalt selenide nanotubes and their catalytic and capacitive behaviors
Source: Royal Society of Chemistry journal article supplement (doi:10.1039/c3ce40152a), 2013-01-01
Supplement: c3ce40152a.pdf [file c3ce40152a.pdf]

## Supporting Information

### Synthesis of polycrystalline cobalt selenide nanotubes and their catalytic and capacitive behaviors

Zhenghua Wang\*, Qiang Sha, Fengwei Zhang, Jun Pu, Wu Zhang\*

*Anhui Key Laboratory of Functional Molecular Solids, College of Chemistry and*

*Materials Science, Anhui Normal University, Wuhu 241000, PR China*

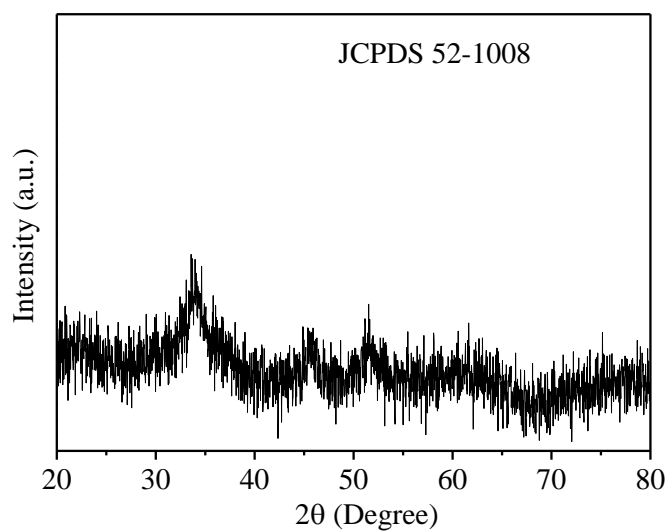

**Fig. S1** XRD pattern of the Co<sub>0.85</sub>Se nanoparticles.

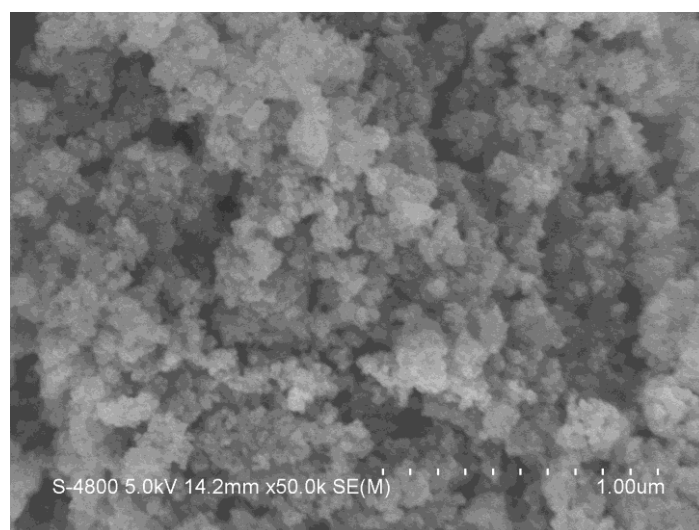

**Fig. S2** FESEM image of the  $\text{Co}_{0.85}\text{Se}$  nanoparticles.
